# Supplementary material for: Interconversion between guanine quartets and triads on the Au(111) surface
Source: Royal Society of Chemistry journal article supplement (doi:10.1039/d2cc00060a), 2022-01-01
Supplement: d2cc00060a1.pdf [file d2cc00060a1.pdf]

# Interconversion between guanine quartet and triad on the Au(111) surface

## *Electronic supplementary information*

Yuanqi Ding,<sup>a</sup> Lei Xie,<sup>a</sup> Donglin Li,<sup>a</sup> Hanlin Shen,<sup>a</sup> Cuiyu Li<sup>b</sup> and Wei Xu<sup>\*a</sup>

<sup>a</sup>Interdisciplinary Materials Research Center, College of Materials Science and Engineering, Tongji University, Shanghai 201804, P. R. China

<sup>b</sup>Advanced Computing East China Sub-Center, Suma Technology Co., Ltd., Kunshan 215300, P. R. China

\* Correspondence: [xuwei@tongji.edu.cn](mailto:xuwei@tongji.edu.cn)

## STM images

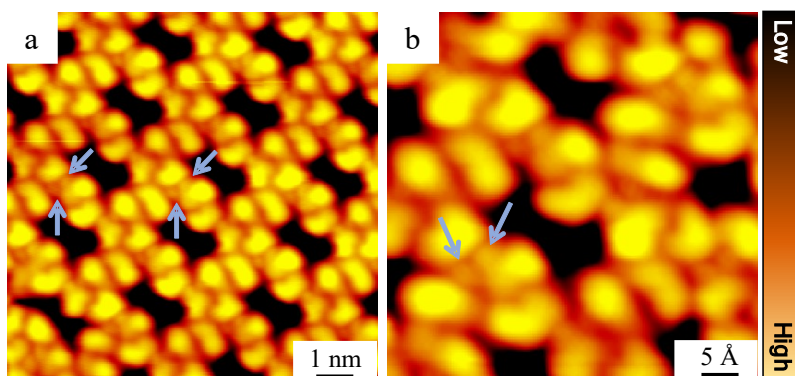

**Figure S1.** STM images of the  $9eG_3Na_2$  network with a special tip state, in which the Na cations can be visible as indicated by blue arrows. Scanning conditions:  $I_t = 0.9$  nA,  $V_t = -1400$  mV.

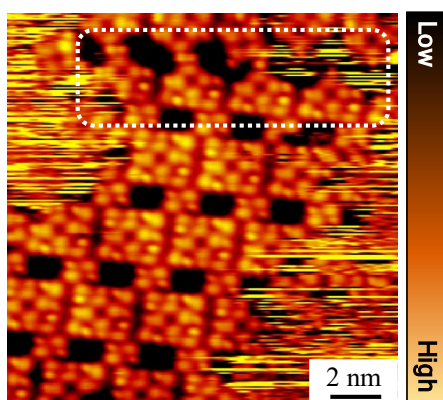

**Figure S2.** STM image of hybrid supramolecular network composed of  $9eG_3Na_2$  and  $9eG_4Na_1$  on Au(111). The outlined defects help to ensure the composition of two kinds of elementary motifs, in which some  $9eG_3Na_2$  motifs are missing. Scanning conditions:  $I_t = 0.8$  nA,  $V_t = 1480$  mV.

## DFT calculations

| Table S1. Details of the DFT calculations.                                        |                                                                                   |                                                                                    |                                                                                     |
|-----------------------------------------------------------------------------------|-----------------------------------------------------------------------------------|------------------------------------------------------------------------------------|-------------------------------------------------------------------------------------|
| 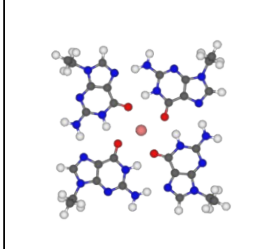 |  |  |  |
| <b>9eG<sub>4</sub>Na<sub>1</sub></b><br>-586.9833 eV                              | <b>9eG<sub>3</sub>Na<sub>2</sub></b><br>-439.8597 eV                              | <b>9eG</b><br>-145.2900 eV                                                         | <b>Na</b><br>-0.0074 eV                                                             |

### $E_b$ of 9eG<sub>4</sub>Na<sub>1</sub> motif

$$E_b = (-586.9833 - (-145.2900 \times 4) - (-0.0074)) / 4 = -1.4540 \text{ eV/molecule}$$

### $E_b$ of 9eG<sub>3</sub>Na<sub>2</sub> motif

$$E_b = (-439.8597 - (-145.2900 \times 3) - (-0.0074 \times 2)) / 3 = -1.3283 \text{ eV/molecule}$$

The above detail data shows that the  $E_b$  value of the 9eG<sub>4</sub>Na<sub>1</sub> motif is calculated to be 1.45 eV per molecule, and the  $E_b$  value of the 9eG<sub>3</sub>Na<sub>2</sub> motif is calculated to be 1.33 eV per molecule, which is in accordance with the experimental results.

## Methods

All STM experiments were performed in a UHV chamber (base pressure  $1 \times 10^{-10}$  mbar) equipped with a variable-temperature, fast-scanning “Aarhus-type” STM using electrochemically etched W tips purchased from SPECS,<sup>1,2</sup> a molecular evaporator and an e-beam evaporator, and other standard instrumentation for sample preparation. The Au(111) substrate was prepared by several cycles of 1.5 keV Ar<sup>+</sup> sputtering followed by annealing to 800 K for 15 min, resulting in clean and flat terraces separated by monatomic steps. The 9eG molecule (purchased from Sigma-Aldrich, purity > 98%)

was loaded into the glass crucible in the molecular evaporator. After a thorough degassing, the molecules are deposited onto the Au(111) surface by thermal sublimation. The alkali metal sodium was evaporated from Alvasource (from Alvatec) *via* conventional resistance heating after fully degassing. The sample was thereafter transferred within the UHV chamber to the STM, where measurements were carried out at ~100-150 K. All of the STM images were further smoothed to eliminate noises.

The calculations were performed in the framework of DFT by using the Vienna *ab initio* simulation package (VASP).<sup>3, 4</sup> The projector-augmented wave method was used to describe the interaction between ions and electrons;<sup>5, 6</sup> the Perdew-Burke-Ernzerhof generalized gradient approximation (GGA) exchange-correlation functional was employed,<sup>7</sup> and van der Waals interactions were included using the dispersion-corrected DFT-D3 method of Grimme.<sup>8</sup> The atomic structures were relaxed using the conjugate gradient algorithm scheme as implemented in the VASP code until the forces on all unconstrained atoms were  $\leq 0.03$  eV/Å.

## Reference

- 1 F. Besenbacher, *Rep. Prog. Phys.*, 1996, **59**, 1737.
- 2 E. Lægsgaard, L. Österlund, P. Thostrup, P. B. Rasmussen, I. Stensgaard and F. Besenbacher, *Rev. Sci. Instrum.*, 2001, **72**, 3537.
- 3 G. Kresse and J. Hafner, *Phys. Rev. B*, 1993, **48**, 13115.
- 4 G. Kresse and J. Furthmüller, *Phys. Rev. B*, 1996, **54**, 11169.
- 5 P. E. Blöchl, *Phys. Rev. B*, 1994, **50**, 17953.
- 6 G. Kresse and D. Joubert, *Phys. Rev. B*, 1999, **59**, 1758.

7 J. P. Perdew, K. Burke and M. Ernzerhof, *Phys. Rev. Lett.*, 1997, **77**, 3865.

8 S. Grimme, J. Antony, S. Ehrlich and H. Krieg, *J. Chem. Phys.*, 2010, **132**, 154104.
